# Supplementary material
Source: PubMed Central journal article supplement (PMC10844005)
Supplement: NIHMS1956268-supplement-Supplementary_Table_S1.pdf [file NIHMS1956268-supplement-Supplementary_Table_S1.pdf]

**Supplementary Table S1. List of primer sequences for qRT-PCR**

| Gene symbol                  | Sequences (5' to 3')     |                         |
|------------------------------|--------------------------|-------------------------|
|                              | Forward primer           | Reverse primer          |
| Gene expression, mouse genes |                          |                         |
| Actin                        | CCACAGCTGAGAGGGGAAATC    | CTTCTCCAGGGAGGAAGAGG    |
| Pri-miR-9-1                  | AAAATAACCCCATACACTGCGC   | TCGGCCACTACCAGCGTT      |
| Pri-miR-9-2                  | AAAACCTCCTTCAAGGTCACCGA  | GGTTGCAGTCTTTCTTTCCGG   |
| Pri-miR-9-3                  | ATGACTCTCACAACCTTCTGC    | TTCTCTGGGCTCCTCTGGCT    |
| Runx2                        | CCCAGCCACCTTTACCTACA     | TATGGAGTGCTGCTGGTCTG    |
| Ocn                          | GCAATAAGGTAGTGAACAGACTCC | GTTTGTAGGCGGTCTTCAAGC   |
| Col1a1                       | GAGCGGAGAGTACTGGATCG     | GTTAGGGCTGATGTACCAGT    |
| Osx                          | AGCGACCACTTGAGCAAACAT    | GCGGCTGATTGGCTTCTTCT    |
| Alp                          | ATCTTTGGTCTGGCTCCCATG    | TTTCCCGTTCACCGTCCAC     |
| Fst                          | GAGCAAGGAAGAGTGTTGCAG    | CTCACACGTTTCTTTACAAGGGA |
| Igf1                         | CACATCATGTCGTCTTACACC    | GGAAGCAACACTCATCCACAATG |
| IL-7                         | GGCACACAAACACTGGTGA ACT  | TGCATCATTCTTTTTCTGTTCTT |
| Csf1                         | GTGTCAGA AACTGTAGCCAC    | TCAAAGGCAATCTGGCATGAAG  |
| Cxcl12                       | GAGCCAACGTCAAGCATCTG     | CGGGTCAATGCACACTTGTC    |
